# Supplementary material for: Integrin alpha 11 in the regulation of the myofibroblast phenotype: implications for fibrotic diseases
Source: PubMed Central journal article supplement — Exp Mol Med. 2017 Nov 17;49(11):e396–. doi: 10.1038/emm.2017.213 (PMC5704196; doi:10.1038/emm.2017.213), 2017-11-17
Supplement: emm2017213x1.pdf [file emm2017213x1.pdf]

## SUPPLEMENTARY INFORMATION

### **Integrin alpha 11 in regulation of myofibroblasts phenotype: Implication for fibrotic diseases**

Ruchi Bansal<sup>1</sup>, Shigeki Nakagawa<sup>2</sup>, Saleh Yazdani<sup>1</sup>, Joop van Baarlen<sup>3</sup>, Anu Venkatesh<sup>2</sup>, Anna P Koh<sup>2</sup>, Won-Min Song<sup>2</sup>, Nicolas Goossens<sup>2</sup>, Hideo Watanabe<sup>4</sup>, Mary B Beasley<sup>5</sup>, Charles A Powell<sup>6</sup>, Gert Storm<sup>1,7</sup>, Naftali Kaminski<sup>8</sup>, Harry van Goor<sup>9</sup>, Scott L Friedman<sup>2</sup>, Yujin Hoshida<sup>2</sup>, Jai Prakash<sup>1,10\*</sup>

<sup>1</sup>Targeted Therapeutics, Department of Biomaterials Science and Technology, MIRA Institute for Biomedical Technology and Technical Medicine, Faculty of Science and Technology, University of Twente, Enschede, The Netherlands. <sup>2</sup>Division of Liver diseases, Department of Medicine, Liver Cancer Program, Tisch Cancer Institute, Department of Medicine, Icahn School of Medicine at Mount Sinai, New York, NY, USA. <sup>3</sup>Laboratorium Pathologie Oost-Nederland, Hengelo, 7555 BB, The Netherlands. <sup>4</sup>Department of Medical Oncology, Dana-Farber Cancer Institute, Harvard Medical School, Boston, Massachusetts. <sup>5</sup>Department of Pathology, Department of Medicine, Icahn School of Medicine at Mount Sinai, New York, NY; Department of Medicine, Icahn School of Medicine at Mount Sinai, New York, NY. <sup>6</sup>Division of Pulmonary, Critical Care, and Sleep Medicine, Icahn School of Medicine at Mount Sinai, New York, NY. <sup>7</sup>Department of Pharmaceutics, Utrecht Institute of Pharmaceutical Sciences, Faculty of Science, Utrecht University, Utrecht, The Netherlands. <sup>8</sup>Yale School of Medicine, Pulmonary, Critical Care and Sleep Medicine, New Haven, Connecticut, United States. <sup>9</sup>Department of Pathology and Medical Biology, University of Groningen, University Medical Center Groningen, Groningen, The Netherlands. <sup>10</sup>Department of Oncology-Pathology, Karolinska Institutet, Stockholm, Sweden.

**Supplementary Table 1: Antibodies used for the immunohistochemistry**

| <b>Primary Antibody</b>                       | <b>Source</b>     | <b>Catalog no.</b> |
|-----------------------------------------------|-------------------|--------------------|
| Polyclonal rabbit anti- $\alpha$ -SMA         | Abcam             | ab5694             |
| Monoclonal mouse anti- $\alpha$ -SMA          | Sigma             | A2547              |
| Polyclonal goat anti-collagen I               | Southern Biotech  | 1310-01            |
| Polyclonal goat anti-desmin                   | Santa Cruz        | sc-7559            |
| Polyclonal goat anti-vimentin                 | Santa Cruz        | sc-7557            |
| Polyclonal goat anti-human ITGA11             | R & D systems     | AF4235             |
| Monoclonal rat anti-ITGA11                    | R & D systems     | MAB4235            |
| Monoclonal rat anti-Gli1                      | R & D systems     | MAB3324            |
| Monoclonal mouse Anti-Vinculin antibody       | Sigma             | V9131              |
| <b>Secondary Antibody</b>                     | <b>Source</b>     | <b>Catalog no.</b> |
| Polyclonal Goat anti-rabbit IgG               | DAKO              | P044801            |
| Polyclonal Goat anti-mouse IgG                | DAKO              | P044701            |
| Polyclonal Rabbit anti-mouse IgG              | DAKO              | P016102            |
| Polyclonal Rabbit anti-rat IgG                | DAKO              | P045001            |
| Polyclonal goat anti-rat IgG                  | DAKO              | sc2006             |
| Polyclonal Rabbit anti-Goat IgG               | DAKO              | P044901            |
| Alexa Fluor® 594 Donkey anti-Goat IgG (H+L)   | Life technologies | A-11058            |
| Alexa Fluor® 488 Donkey Anti-Goat IgG (H+L)   | Life technologies | A-11055            |
| Alexa Fluor® 594 Donkey Anti-Rabbit IgG (H+L) | Life technologies | A-21207            |
| Alexa Fluor® 488 Donkey anti-Rabbit IgG (H+L) | Life technologies | A-21206            |

**Supplementary Table 2: Sequence of the mouse primers used for quantitative real-time PCR**

| <b>Gene</b>             | <b>Forward primer sequence (5'-3')</b> | <b>Reverse primer sequence (5'-3')</b> |
|-------------------------|----------------------------------------|----------------------------------------|
| Collagen 1 $\alpha$ 1   | TGACTGGAAGAGCGGAGAGT                   | ATCCATCGGTCATGCTCTCT                   |
| Collagen 3 $\alpha$ 1   | ACTGTCCCACGTAAGCACTG                   | CAGGAGGGCCATAGCTGAAC                   |
| Desmin ( $\alpha$ -SMA) | ATGCAGCCACTCTAGCTCGT                   | CTCATACTGAGCCCCGGATGT                  |
| ACTA2                   | ACTACTGCCGAGCGTGAGAT                   | CCAATGAAAGATGGCTGGAA                   |
| GAPDH                   | ACAGTCCATGCCATCACTGC                   | GATCCACGACGGACACATTG                   |
| TGF $\beta$ 1           | GGACTCTCCACCTGCAAGAC                   | CTGGCGAGCCTTAGTTTGGA                   |
| TIMP1                   | ATCAGTGCCTGCAGCTTCTT                   | TGACGGCTCTGGTAGTCCTC                   |
| MMP9                    | CGTCGTGATCCCCACTTACT                   | AACACACAGGGTTTGCCTTC                   |
| MMP13                   | CCAGAACTTCCCAACCATGT                   | GTCTTCCCCGTGTTCTCAA                    |
| ITGA11                  | GGACTTCTTACCGACCAGG                    | CAGCCTCAGGTTGCAGATGA                   |
| PDGF $\beta$ R          | GCTGGAGCTGAGTGAGAGTC                   | GCAGGTAGACCAGGTGACAT                   |
| CD31                    | TCCCTGGGAGGTCGTCCAT                    | GAACAAGGCAGCGGGTTTA                    |
| Gli1                    | TGAAGAAGCAGTTGGGACGG                   | GAACATGGCGTCTCAGGGAA                   |
| SOX9                    | GTGCAAGCTGGCAAAGTTGA                   | TGCTCAGTTCACCGATGTCC                   |
| ITGB1                   | GCAAATGCCAAATCTTGCGG                   | TGGCTGGCAACCCTTCTTTT                   |

**Supplementary Table 3: Sequence of the human primers used for quantitative real-time PCR**

| <b>Gene</b>           | <b>Forward primer sequence (5'-</b> | <b>Reverse primer sequence (5'-3')</b> |
|-----------------------|-------------------------------------|----------------------------------------|
| Collagen 1 $\alpha$ 1 | GTACTGGATTGACCCCAACC                | CGCCATACTCGAACTGGAAT                   |
| Desmin                | GCGGGTTTCGGCTCTAAGG                 | AGAAACTCCTGGTTCACCGC                   |
| ACTA2                 | CCCCATCTATGAGGGCTATG                | CAGTGGCCATCTCATTTC                     |
| Vimentin              | AAATGGCTCGTCACCTTCGT                | CAGCTTCCTGTAGGTGGCAA                   |
| GAPDH                 | TCCAAAATCAAGTGGGGCGA                | TGATGACCCTTTGGCTCCC                    |
| PDGF $\beta$ R        | CATGGGGGTATGGTTTTGTC                | GTAAGGTGCCAACCTGCAAT                   |
| TIMP1                 | GGGACACCAGAAGTCAACC                 | GGGTGTAGACGAACCGGATG                   |
| ITGA5                 | CAACTTCTCCTTGGACCC                  | GTCCTCTATCCGGCTCTGC                    |
| ITGA11                | CAGCTCGCTGGAGAGATACG                | TTACAGGACGTGTTGCGCTC                   |
| ITGB1                 | CCGCGCGGAAAAGATGAAT                 | CCACAATTTGGCCCTGCTTG                   |
| Paxillin              | CATGGACGACCTCGACGC                  | CAAGAACACAGGCCGTTGG                    |
| SOX9                  | AGGAAGTCGGTGAAGAACGG                | CGCCTGAAGATGGCGTTG                     |
| Gli1                  | CCCGGAGTGCAGTCAAGTT                 | AGATGTGCATCGCGAGTTGA                   |
| SHH                   | CAAGCTGGTGAAGGACCTGA                | CGCGTCTCGATCACGTAGAA                   |
| Ptch1                 | TGTAATTGTGAGTCCGCGCT                | GACGCTGGGCTTGGATTTCA                   |
| Smo                   | TAGGGCTTGGGGAGTCGT                  | TGCGCCAGAGAATCCG                       |
| Gli2                  | CTGTAGGTGAGTCGTCCAGC                | CTACTGTCAAGGGGGAAGCAG                  |

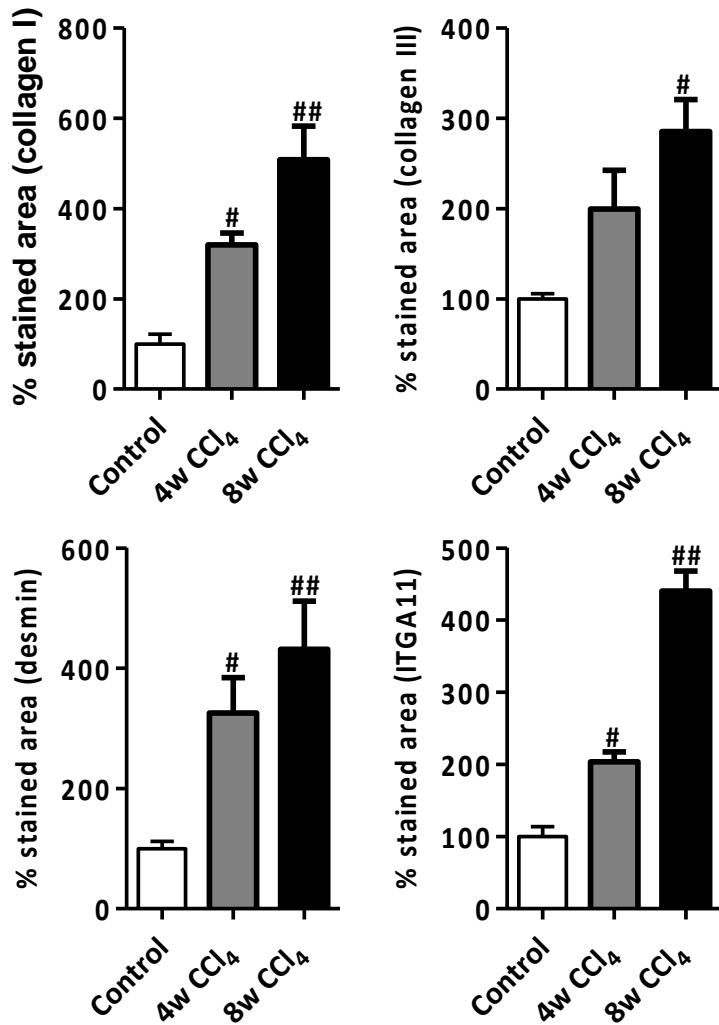

**Supplementary Figure S1. Histological analysis of fibrotic parameters and ITGA11 in control and CCl<sub>4</sub>-induced liver fibrosis mouse models.** Quantitative histological analysis of Collagen I, Collagen III, Desmin and ITGA11 immunohistochemical stainings were performed in livers of control (olive-treated non-fibrotic), 4 weeks and 8 weeks CCl<sub>4</sub>-treated groups. Data represent mean  $\pm$  SEM; n=4. #p<0.05, ##p<0.01, denotes statistical significance as compared to control group.

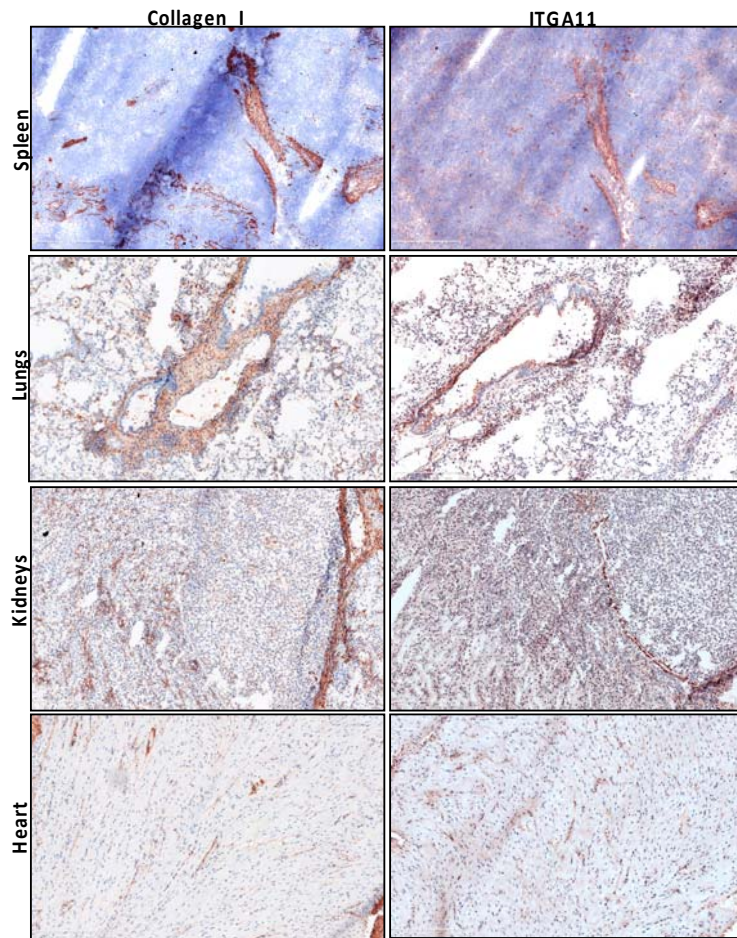

**Supplementary Figure S2. ITGA11 expression in normal healthy mouse organs.** Representative micrographs (Scale bar, 500 $\mu$ m) showing Collagen-I and ITGA11 stained sections from major organs (spleen, lungs, kidneys and heart) from olive oil-treated (control, n=5) healthy mice.

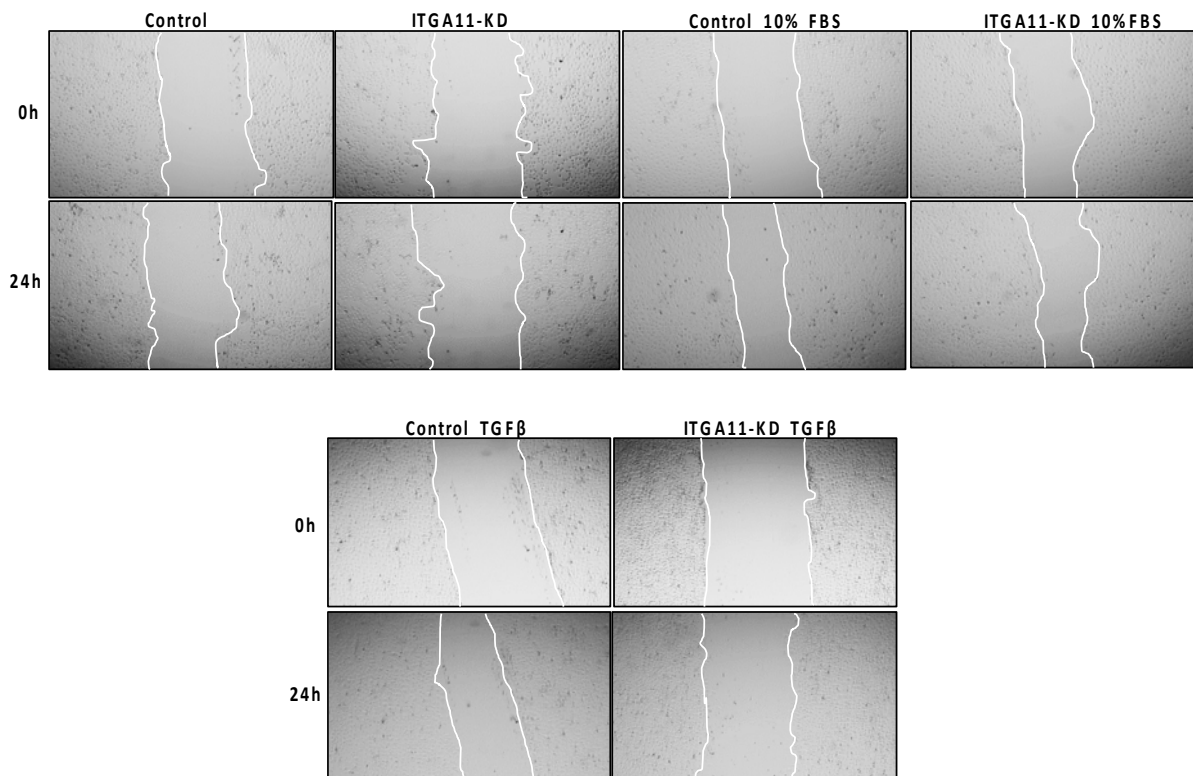

**Supplementary Figure S3. Wound healing response in ITGA11-KD HSCs versus control HSCs.** Representative images depicting scratch wounds made at 0hr and wound closure at 24hr as performed on control HSCs and ITGA11-KD HSCs incubated with different conditions i.e. 0% FBS, 10% FBS and 5ng/ml TGFβ.

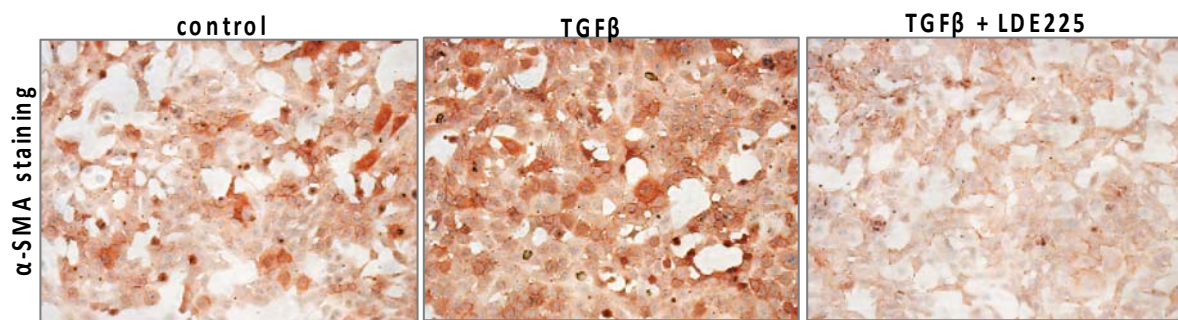

**Supplementary Figure S4. Effect of hedgehog inhibition *in vitro* on  $\alpha$ -SMA expression on TGF $\beta$ -activated human HSCs.** Representative images (scale bars, 200 $\mu$ m) of  $\alpha$ -SMA stained HSCs treated with medium alone (control), TGF $\beta$  (5ng/ml)  $\pm$  10 $\mu$ M Hedgehog inhibitor (LDE225).



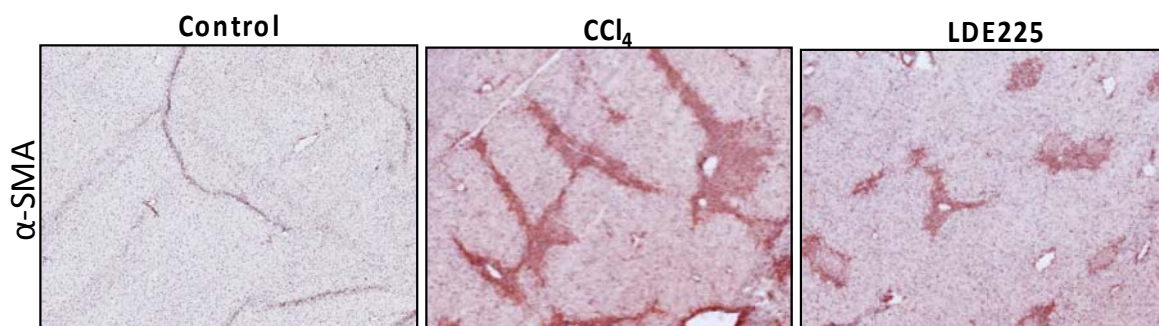

**Supplementary Figure S5. Effect of hedgehog inhibition on  $\alpha$ -SMA expression *in vivo* in CCl<sub>4</sub>-induced acute liver injury mouse model.** Representative photomicrographs (200 $\mu$ M) (n=5 per group) of  $\alpha$ -SMA stained liver sections from normal (olive oil treated), vehicle-treated CCl<sub>4</sub> and LDE225-treated CCl<sub>4</sub> mice.
